# Supplementary material for: Significant Enhancement of 5-Hydroxymethylfural Productivity from D-Fructose with SG(SiO2) in Betaine:Glycerol–Water for Efficient Synthesis of Biobased 5-(Hydroxymethyl)furfurylamine
Source: MDPI journal article supplement (doi:10.3390/molecules27185748), 2022-09-06
Supplement: s1 [file s1]

## Support Information

### Figure Caption

**Figure S1.** HPLC image of 5-HMF(a), BHMF(b), 5-HMFA(c).

### Table Caption

**Table S1.** Preparation of 5-HMF from *D*-fructose under different catalytic systems.

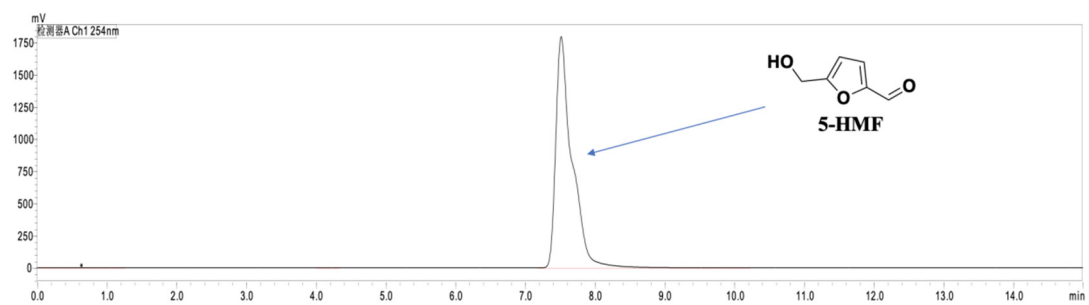

(a)

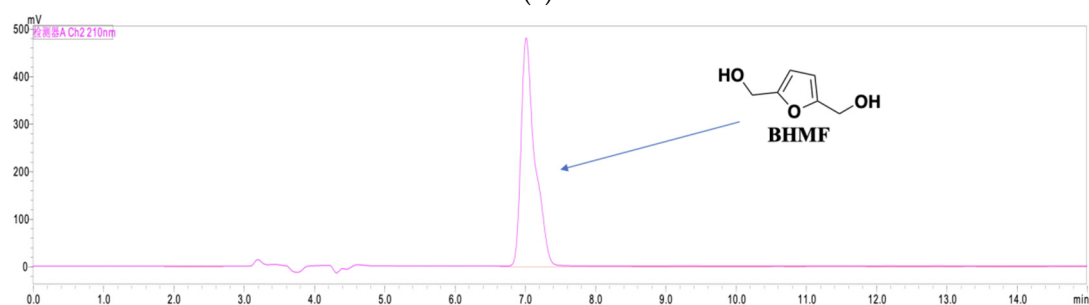

(b)

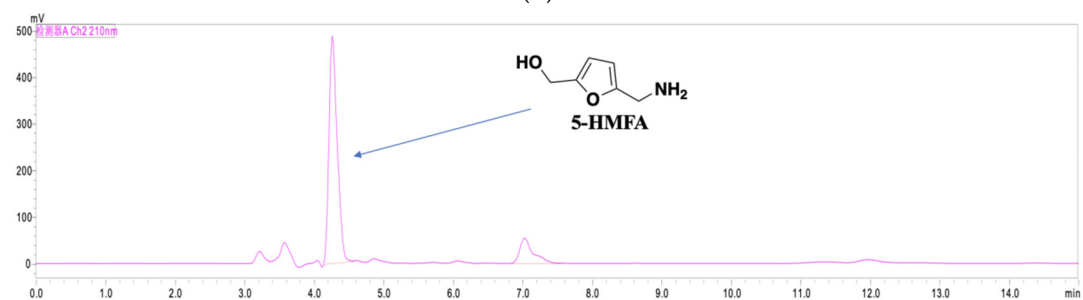

(c)

**Figure S1.** HPLC image of 5-HMF(a), BHMF(b), 5-HMFA(c).

Note: The Chinese in the picture means: Detector.

**Table S1.** Preparation of 5-HMF from *D*-fructose under different catalytic systems.

| <b>Entry</b> | <b>Water</b> | <b>SG(SiO<sub>2</sub>)</b> | <b>B:Gly</b> | <b>5-HMF Yield</b> |
|--------------|--------------|----------------------------|--------------|--------------------|
| 1            | +            | +                          | -            | 1.7%               |
| 2            | +            | -                          | +            | 48.7%              |
| 3            | +            | +                          | +            | 91.7%              |

Condition: B:Gly 20 wt%, SG(SiO<sub>2</sub>) 3 wt%, 150 °C, 1.5 h, reaction system: 50 mL (“+” represents “addition”; “-” represents “no addition”).
